# Supplementary material for: Preparation of Gd-doped AuNBP@mSiO2 nanocomposites for the MR imaging, drug delivery and chemo-photothermal synergistic killing of breast cancer cells
Source: Royal Society of Chemistry journal article supplement (doi:10.1039/d3ra03753c), 2023-01-01
Supplement: d3ra03753c1.pdf [file d3ra03753c1.pdf]

## Supplementary Information

### Preparation of Gd-doped AuNBP@mSiO<sub>2</sub> Nanocomposites for the MR Imaging, Drug Delivery and Chemo-photothermal Synergistic Killing of Breast Cancer Cells

Shiyi Tang<sup>a</sup>, Ruohan Li<sup>a,b</sup>, Tao Luo<sup>a</sup>, Tianhao Huang<sup>a</sup>, Xiaotong Lu<sup>a</sup>, Xinyao Wu<sup>a</sup>, Yulin Dong<sup>a</sup>, Changyu Wu<sup>a</sup>, Kai Xu<sup>\*a,b</sup>, Yong Wang<sup>\*ab</sup>

Table S1 The EDS results of AuNBP@mSiO<sub>2</sub>-Gd-DTTA

| Element | Atomic fraction (%) | Mass fraction (%) |
|---------|---------------------|-------------------|
| O       | 70.30               | 32.02             |
| Si      | 19.28               | 15.42             |
| Gd      | 5.20                | 23.27             |
| Au      | 5.22                | 29.30             |

Table S2 The ICP-MS results of AuNBP@mSiO<sub>2</sub>-Gd-DTTA

| Sampling volume(mL) | Fixed volume (mL) | Dilution factor | Elements | Instrumental results (mg/L) | Content (mg/L) |
|---------------------|-------------------|-----------------|----------|-----------------------------|----------------|
| 0.45                | 10.00             | 1               | Au       | 1.4059                      | 31.24          |
| 0.45                | 10.00             | 1               | Gd       | 0.8704                      | 19.34          |

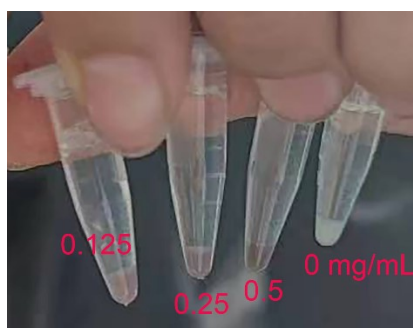

Fig. S1 The bright-field image of cells in EP tube before centrifugation for T<sub>1</sub>WI and T<sub>1</sub> map of 4T1 cells.
